# Supplementary material for: Metabolic labelling of cancer cells with glycodendrimers stimulate immune-mediated cytotoxicity
Source: Royal Society of Chemistry journal article supplement (doi:10.1039/d1md00262g), 2021-11-09
Supplement: d1md00262g1.pdf [file d1md00262g1.pdf]

## SUPPORTING INFORMATION

### Metabolic labelling of cancer cells with glycodendrimers stimulate immune-mediated cytotoxicity.

David Goyard,<sup>a</sup> Peremobowei Iyanu Diriwari,<sup>a</sup> and Nathalie Berthet <sup>\*a</sup>

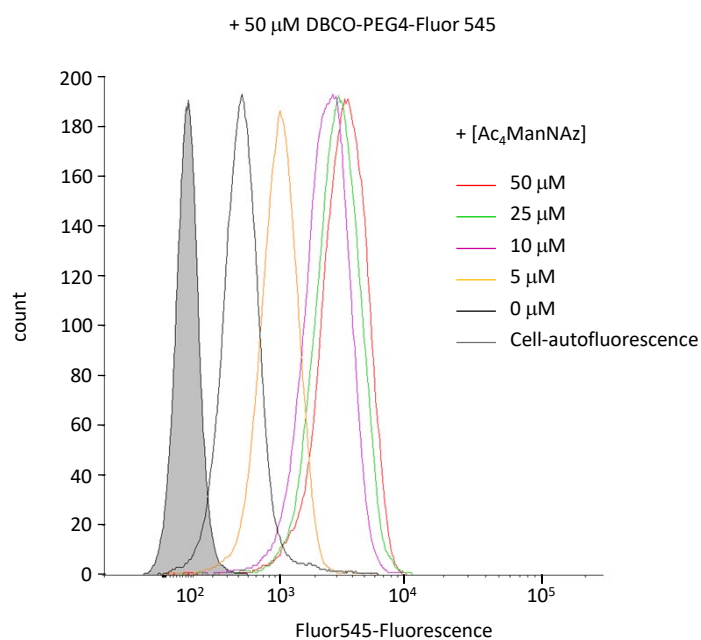

Figure S 1. Flow cytometry analysis of BT-549 metabolically labelled with various concentrations of Ac<sub>4</sub>ManNAz, followed by SPAAC conjugation to 50  $\mu$ M DBCO-PEG<sub>4</sub>-Fluor 545. As control, cells without any treatment and non azido-labelled cells were used.

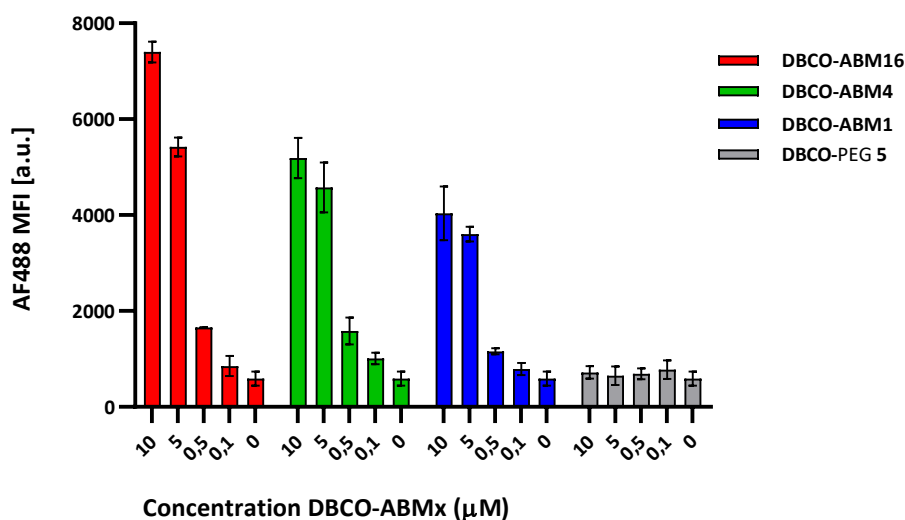

Figure S 2. DBCO-ARM1, 4 and 16 coupling to azido groups exposed at the BT-549 cell-surface. Azido labelled cells or unlabelled cells were treated with DBCO-ARMs or DBCO-PEG (10-0,1 µM). SPAAC coupling of the DBCO-conjugates was revealed using anti-Rha IgM naturally present in HS and fluorescent secondary antibody. Cell fluorescence was analysed by flow cytometry. Data are presented as mean  $\pm$  SD (n = 3).

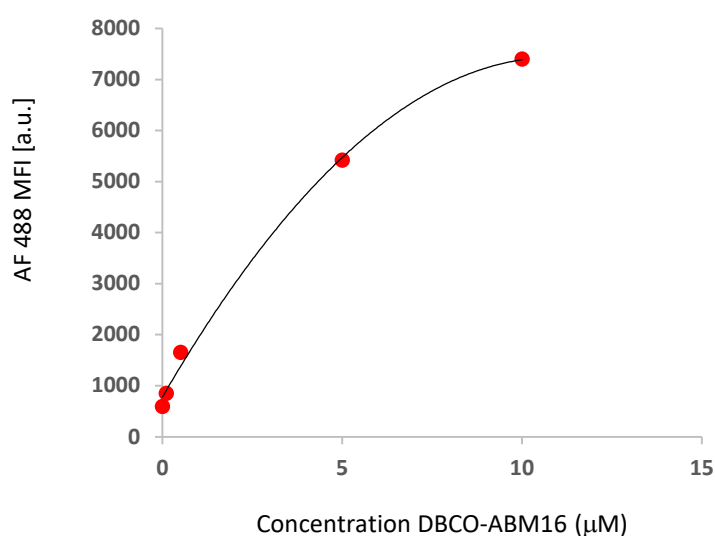

Figure S 3. Dose-response curve of the fluorescence of BT-549 cells metabolically labelled with the azido sugar Ac<sub>4</sub>ManNAz, followed by SPAAC conjugation to DBCO-ABM16 at various concentrations (0 µM, 0,1 µM, 0,5 µM, 5 µM, 10 µM). Fluorescence was analysed by flow cytometry.

## Compound characterizations

Compound **DBCO-ARM1**

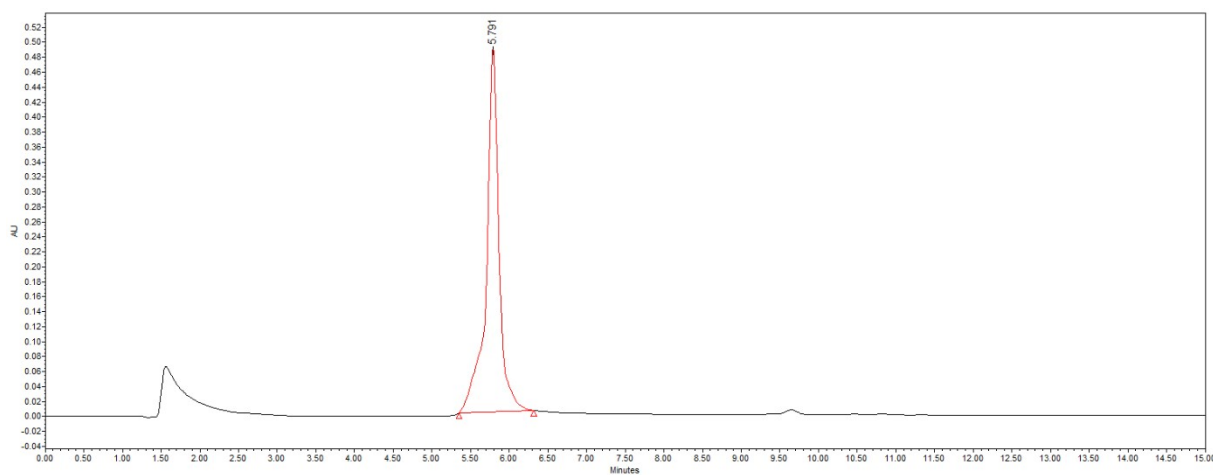

Figure S 4. Analytical RP-HPLC spectrum of compound **DBC0-ABM1** (5-100% B in 15 minutes)

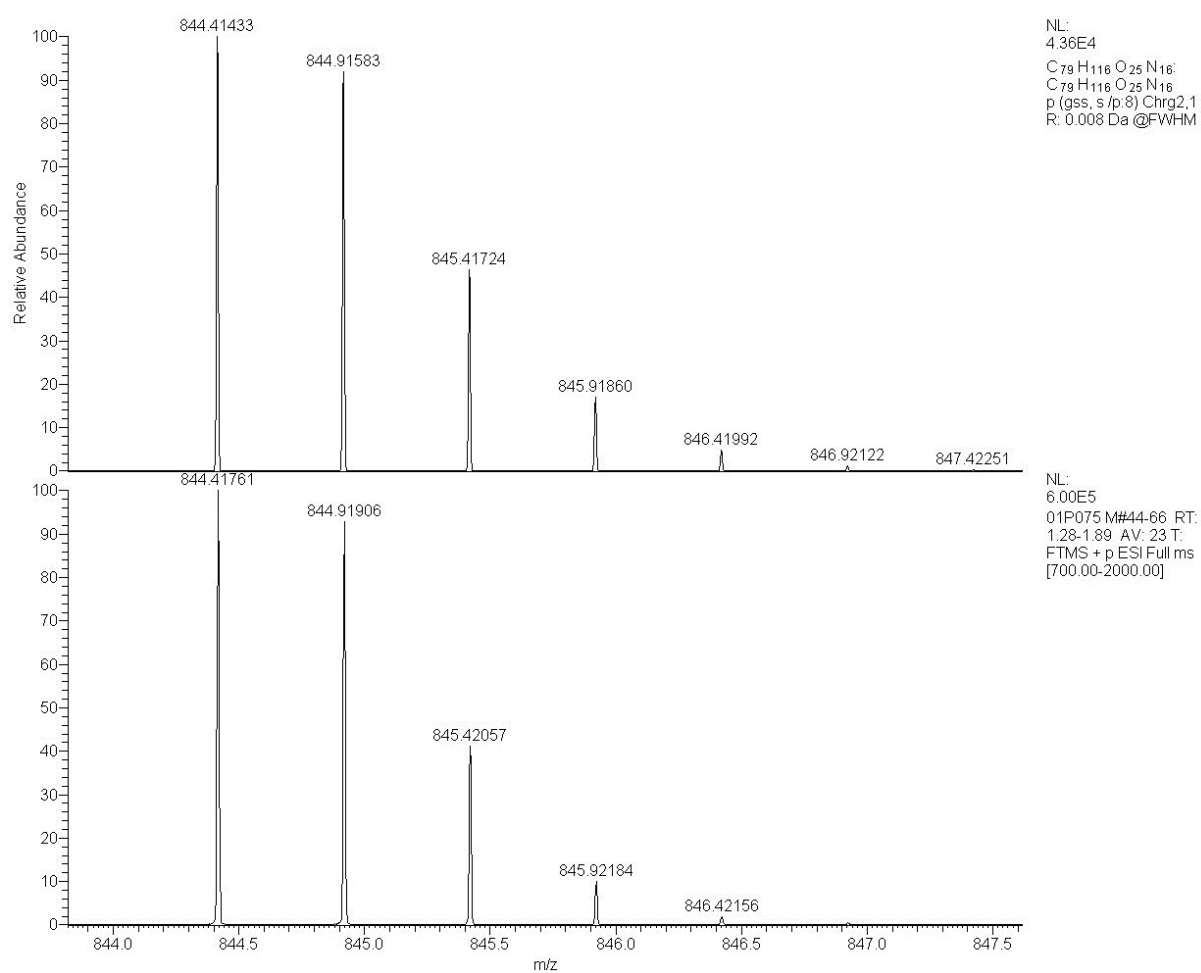

Figure S 5. Theoretical (top) and measured (bottom) HRMS spectrum of compound **DBC0-ABM1**

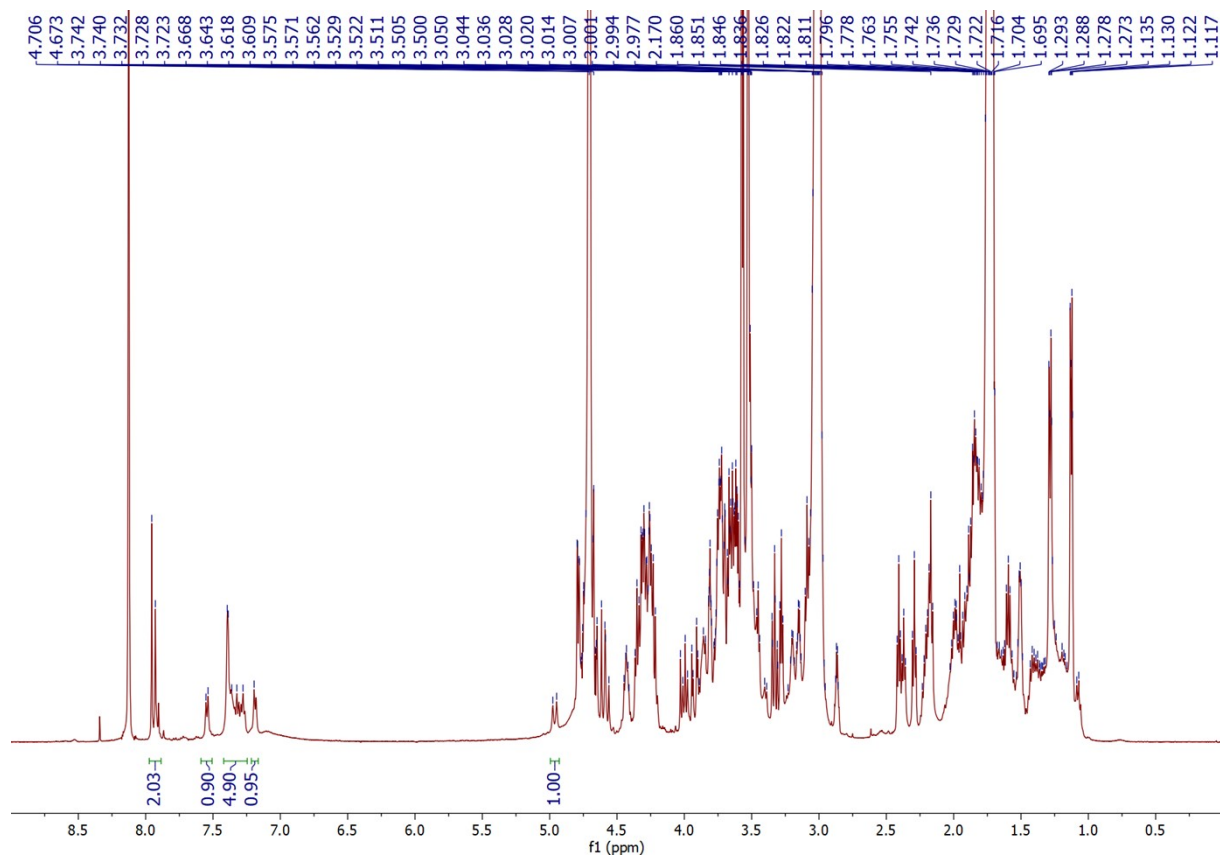

Figure S 6.  $^1\text{H}$  NMR spectrum of compound **DBCO-ABM1** ( $\text{D}_2\text{O}$ , 500 MHz)

Compound **DBCO-ABM4**

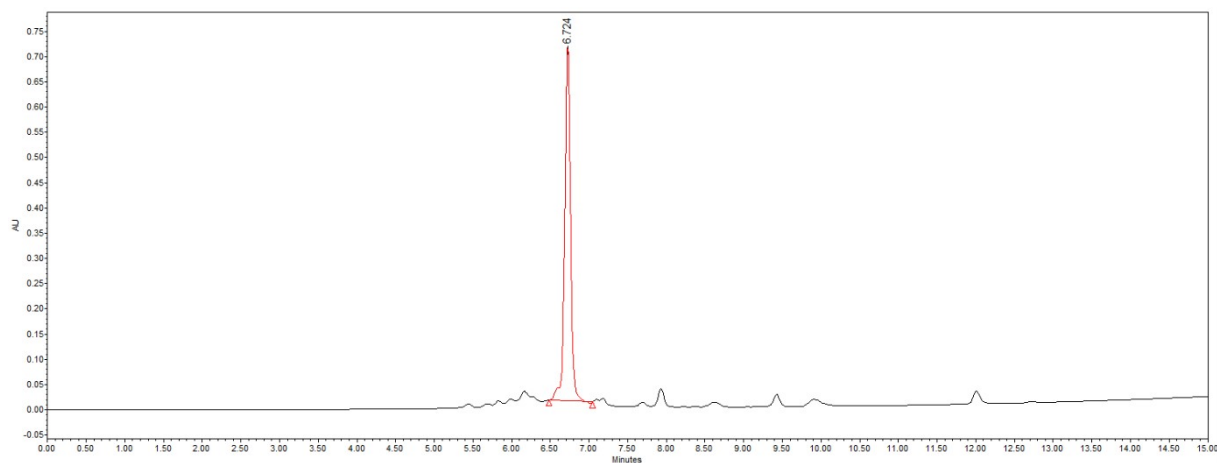

Figure S 7. Analytical RP-HPLC spectrum of compound **DBCO-ABM4** (5-100% B in 15 minutes)

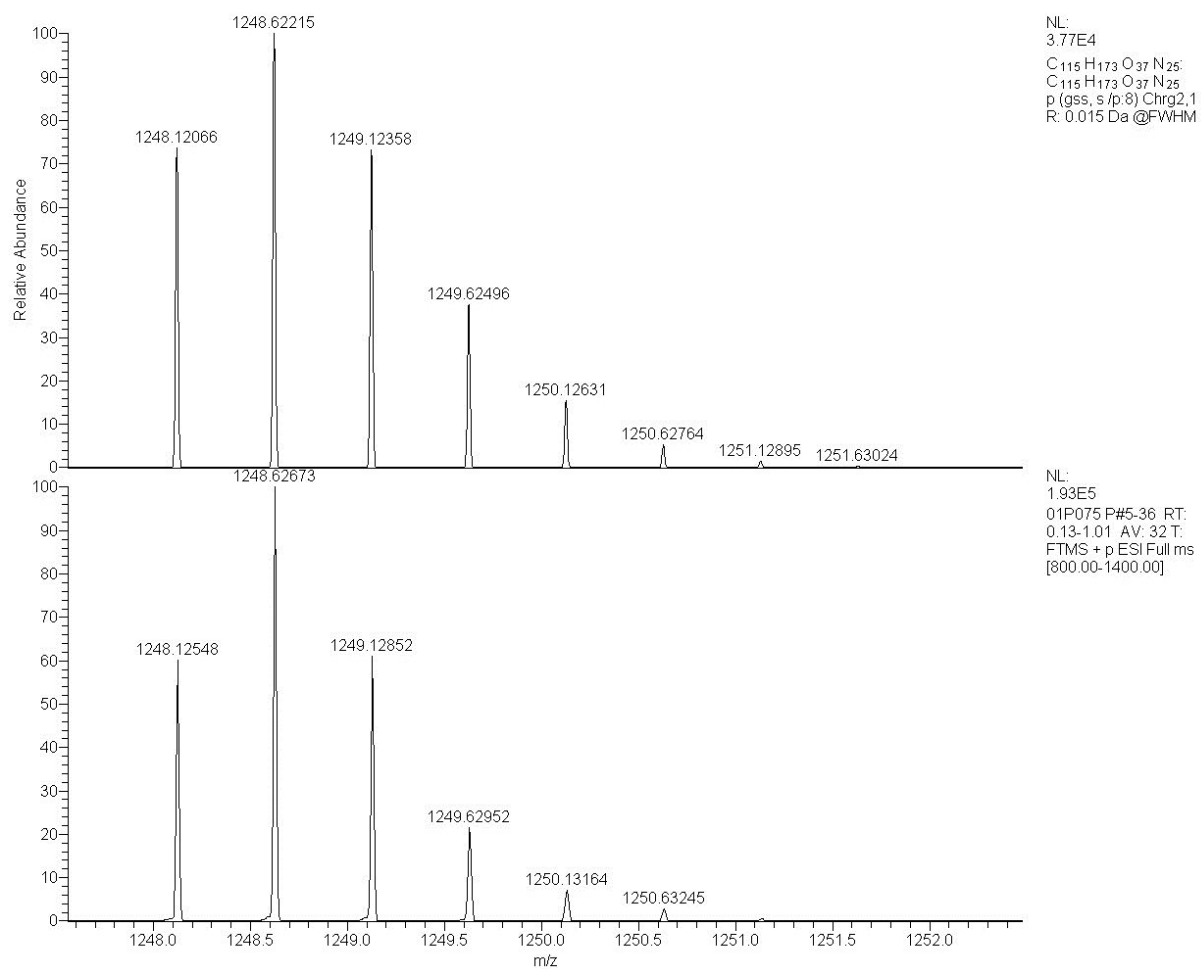

Figure S 8. Theoretical (top) and measured (bottom) HRMS spectrum of compound **DBCO-ABM4**

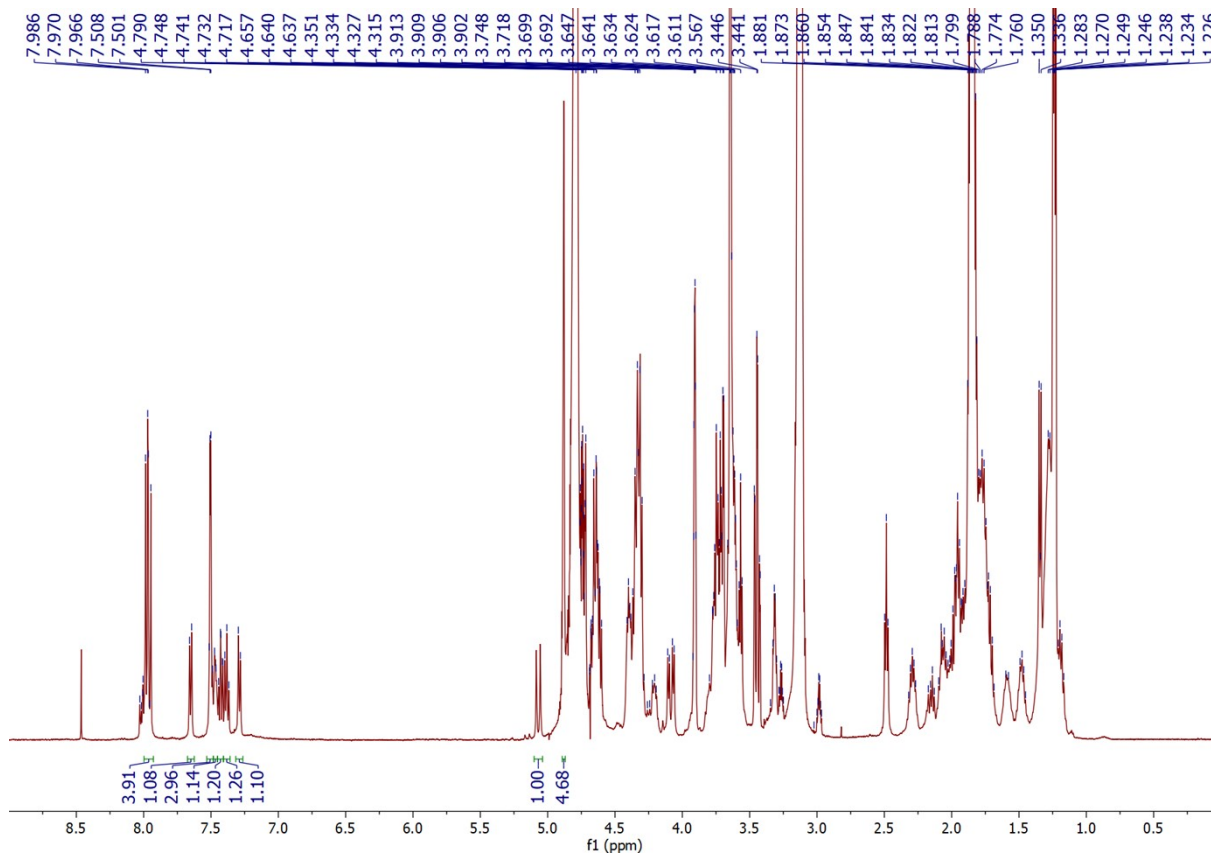

Figure S 9.  $^1\text{H}$  NMR spectrum of compound **DBCO-ABM4** ( $\text{D}_2\text{O}$ , 500 MHz)

Compound **DBCO-ABM16**

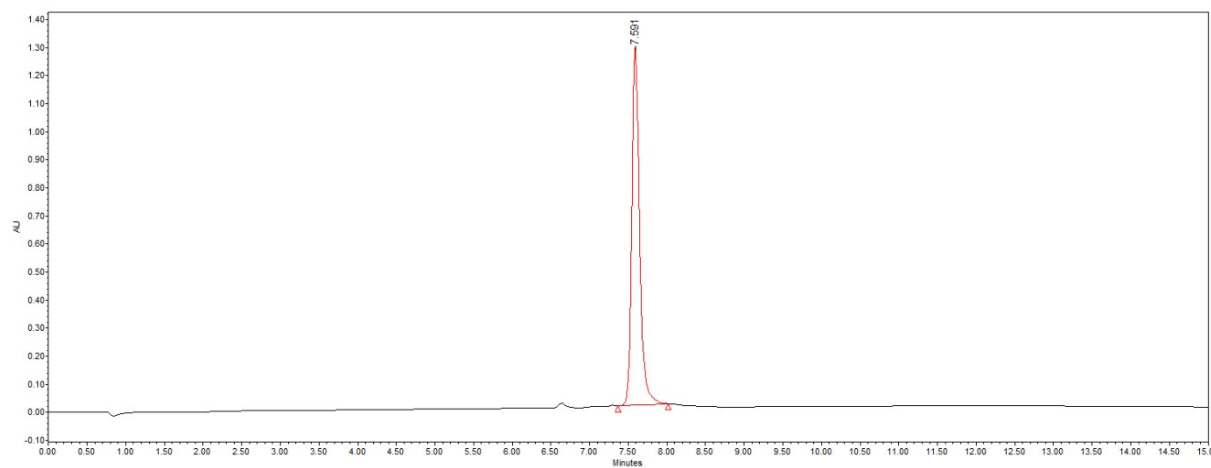

Figure S 10. Analytical RP-HPLC spectrum of compound **DBCO-ARM16** (0-80% B in 15 minutes)

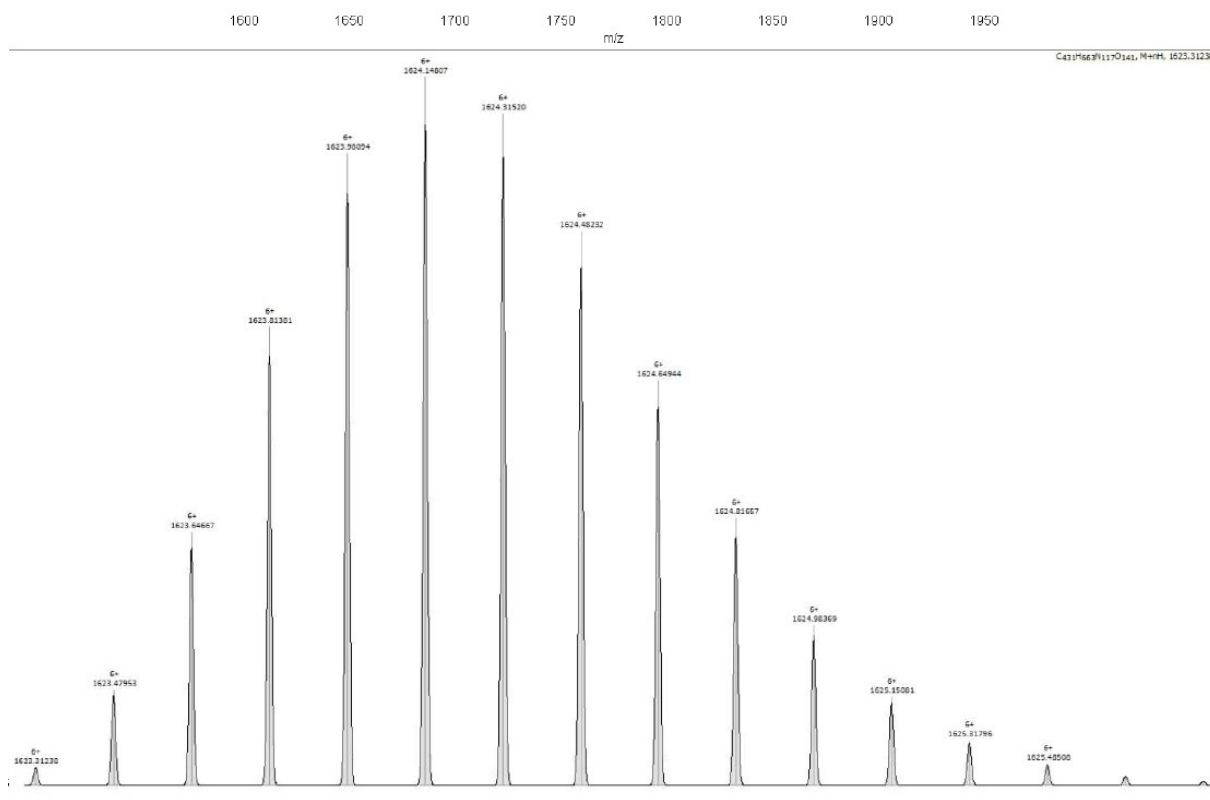

Q1P076C #116-179 RT: 3.47-5.28 AV: 64 NL: 1.42E5  
 T: FTMS + p ESI Full ms [1100.00-2000.00]

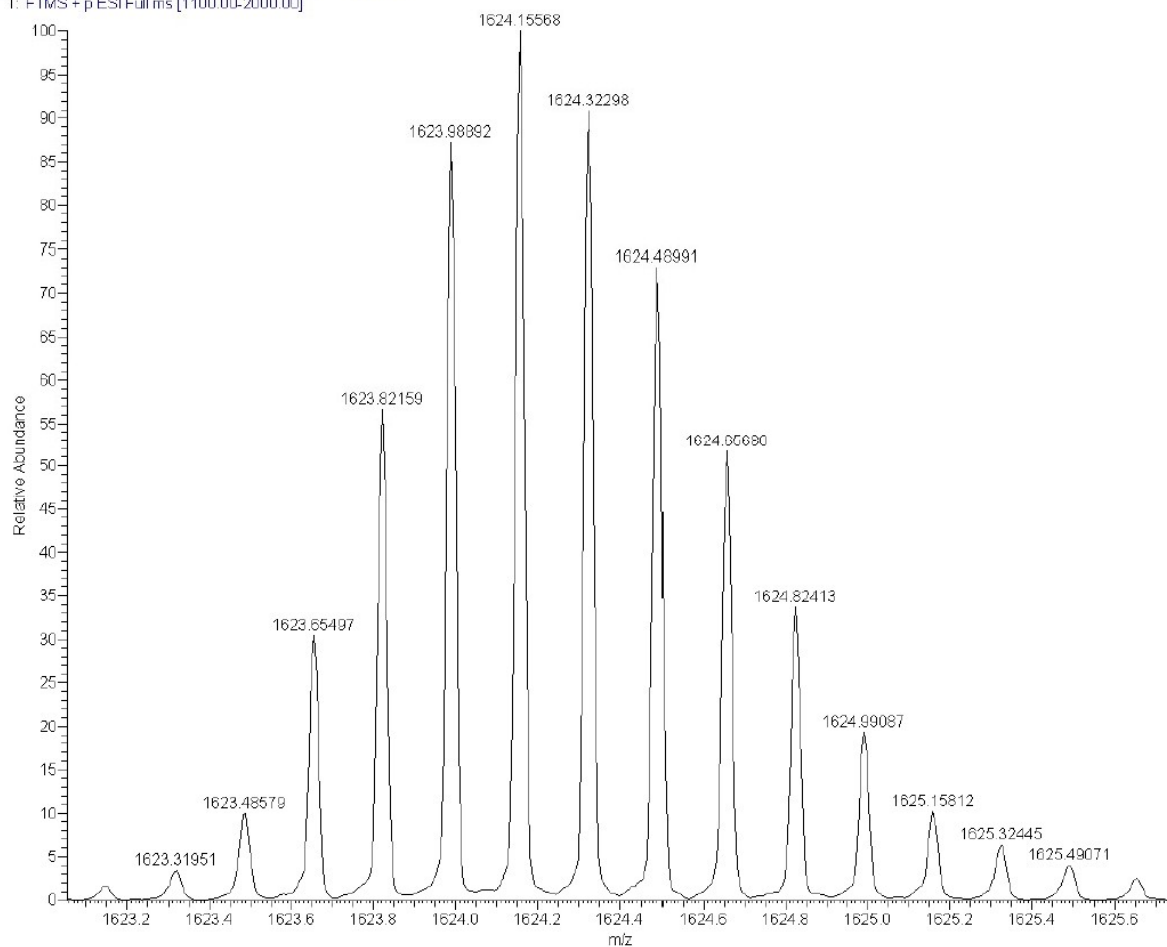

Figure S 11. Theoretical (top) and measured (bottom) HRMS spectrum of compound **DBCO-ARM16**

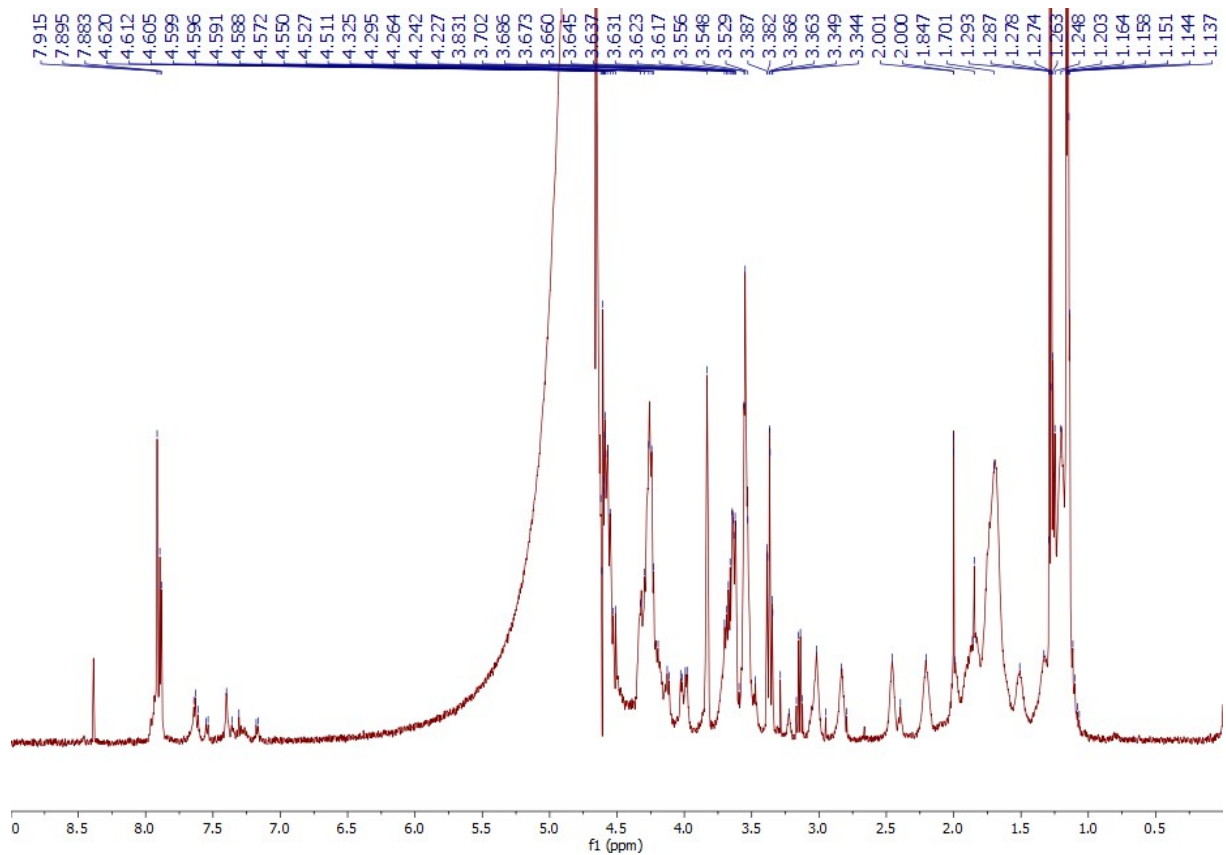

Figure S 12.  $^1\text{H}$  NMR spectrum of compound **DBCO-ABM16** ( $\text{D}_2\text{O}$ , 500 MHz)
